# Supplementary material
Source: PubMed Central journal article supplement (PMC3594474)

**A**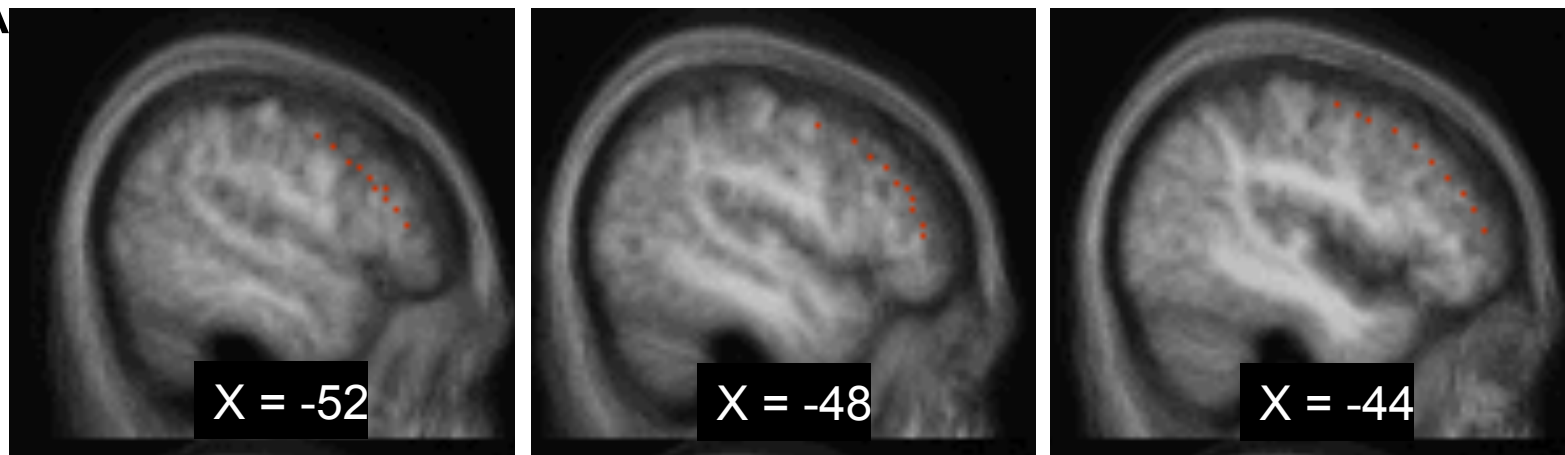**B**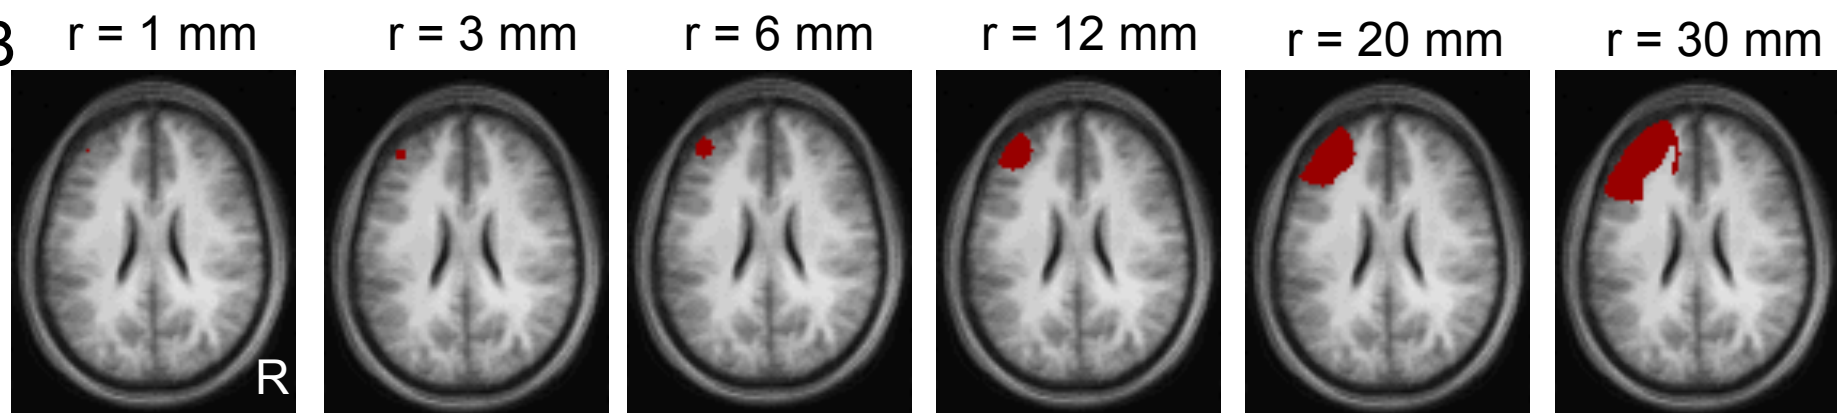**C**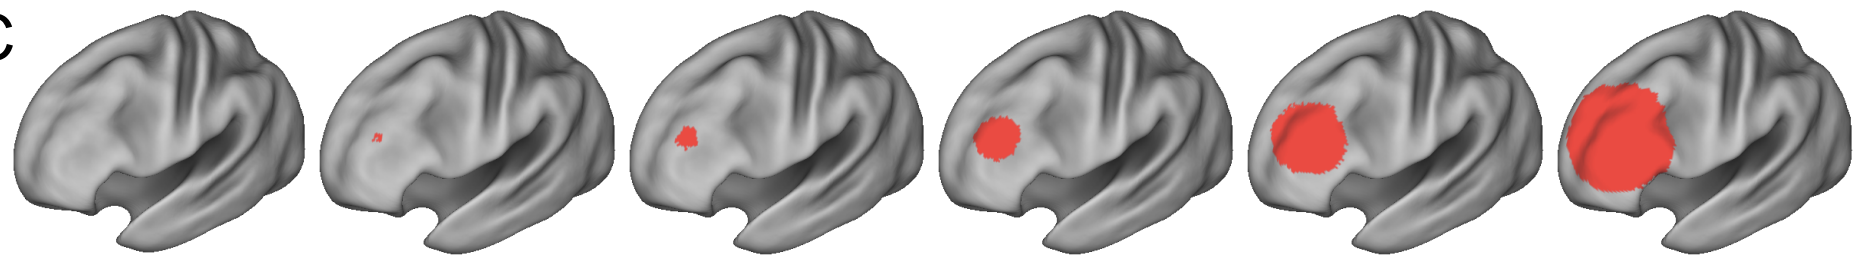

Supplement: NIHMS421348-supplement-02.pdf [file NIHMS421348-supplement-02.pdf]

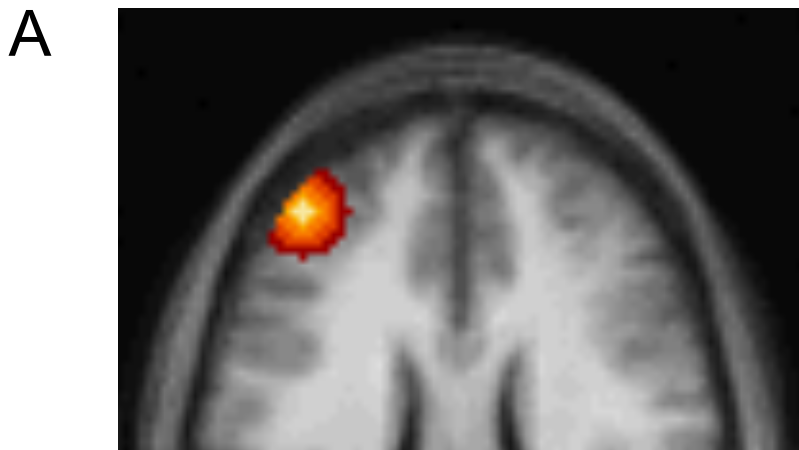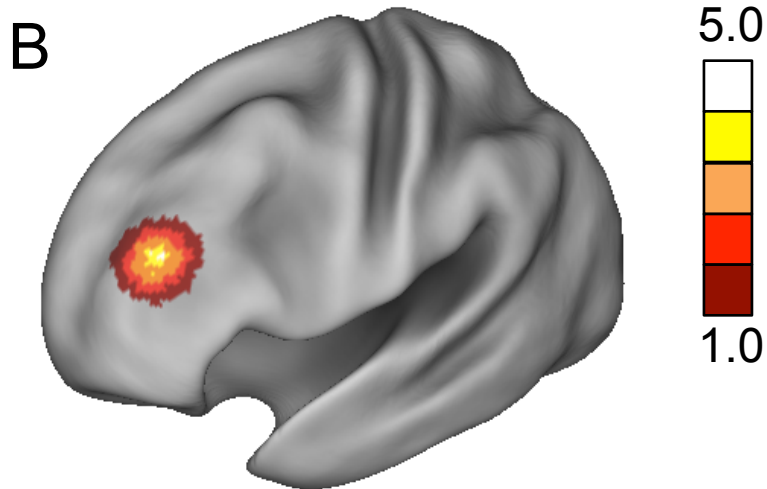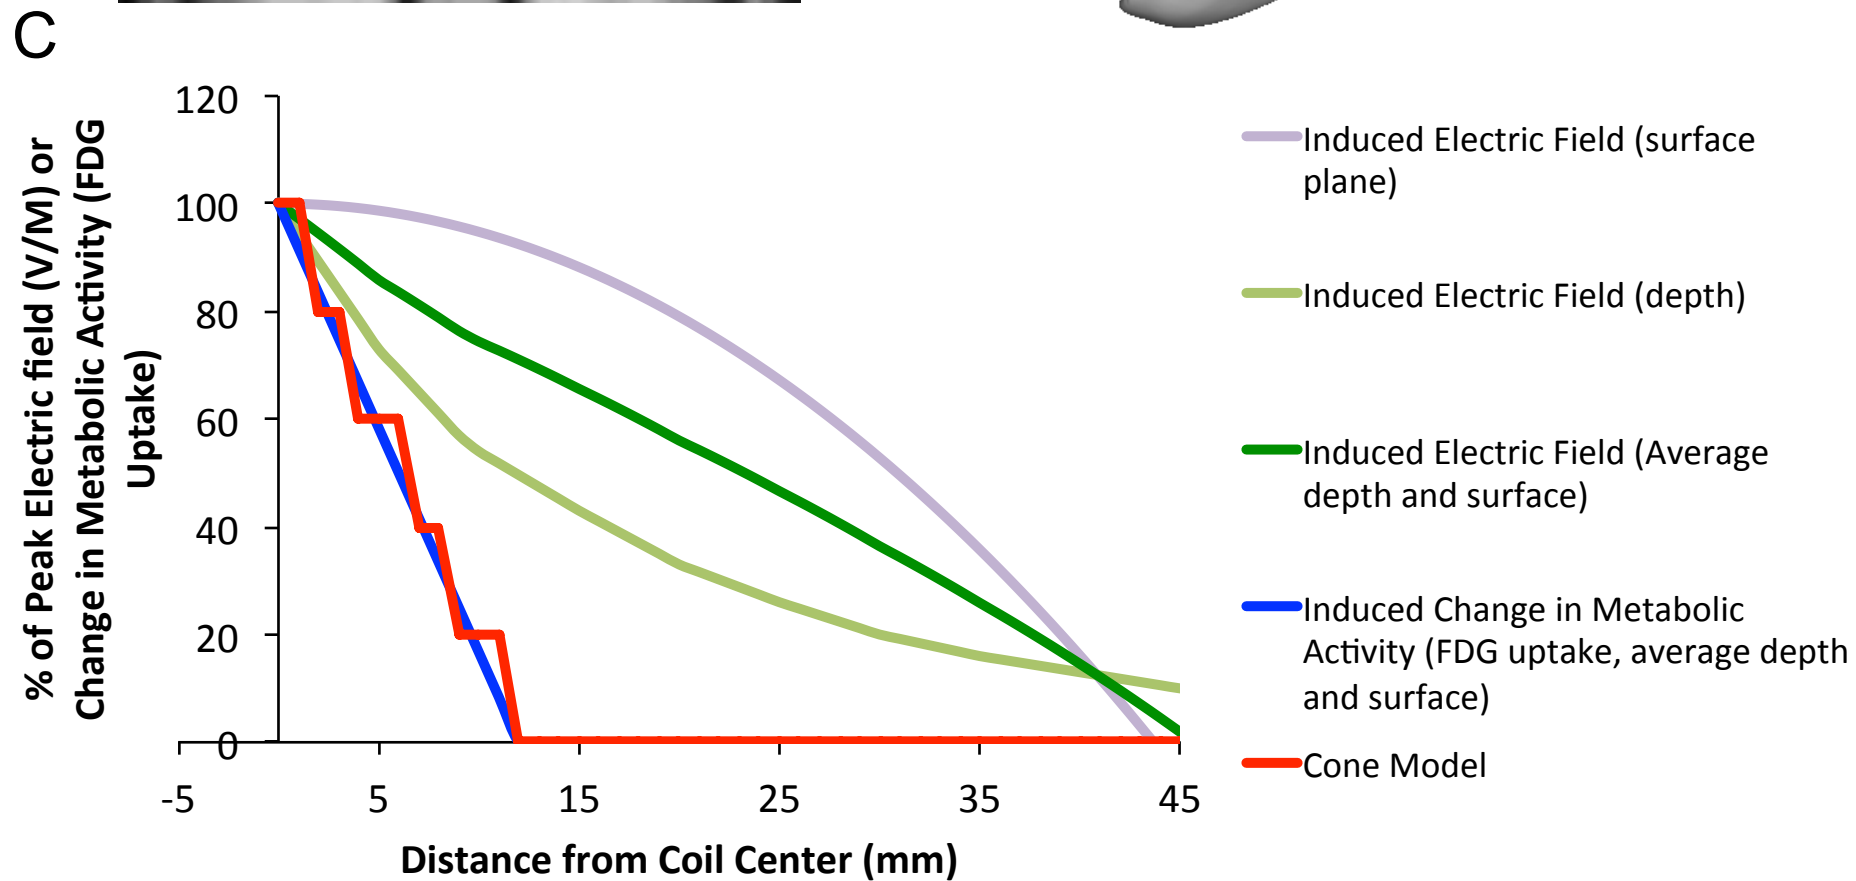

Supplement: NIHMS421348-supplement-03.pdf [file NIHMS421348-supplement-03.pdf]

Variance across subjects is similar in magnitude to variance across space in the DLPFC

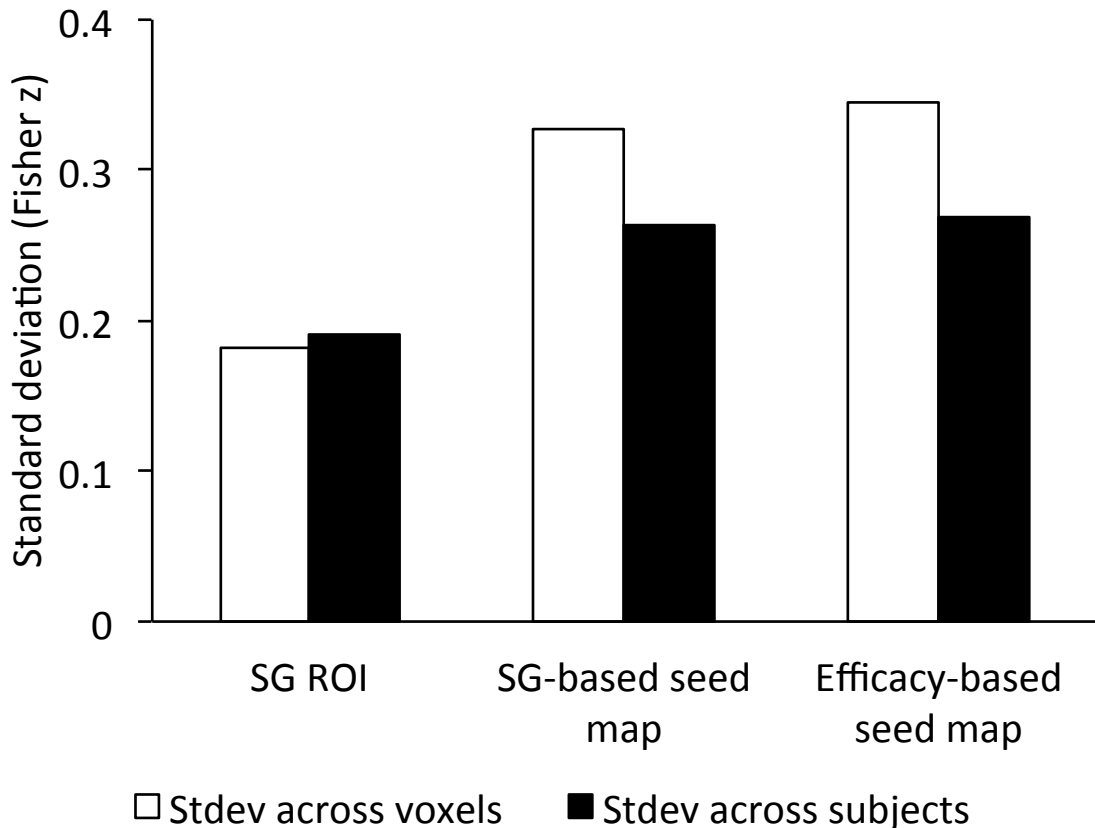

Supplement: NIHMS421348-supplement-04.pdf [file NIHMS421348-supplement-04.pdf]

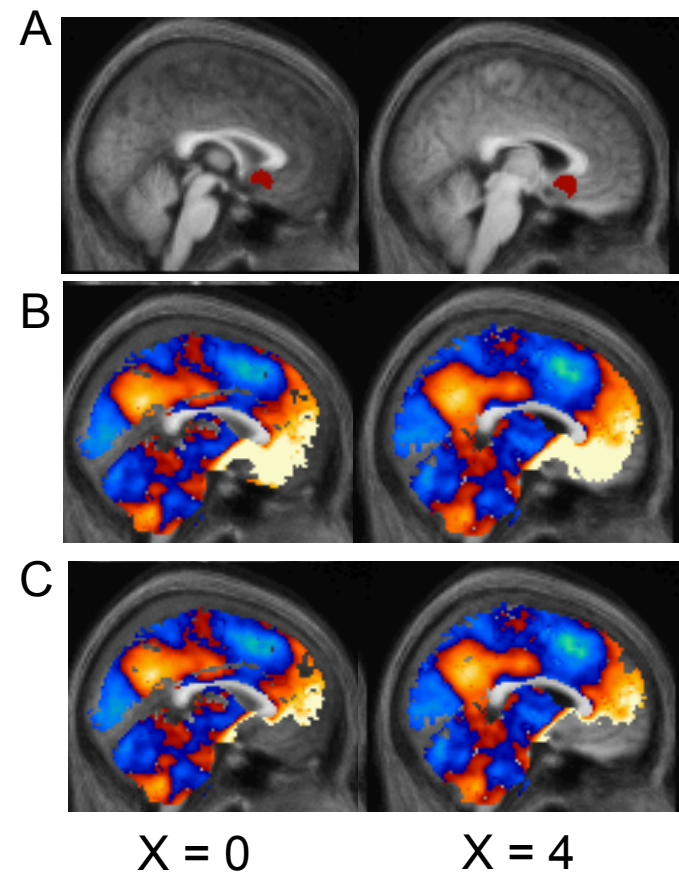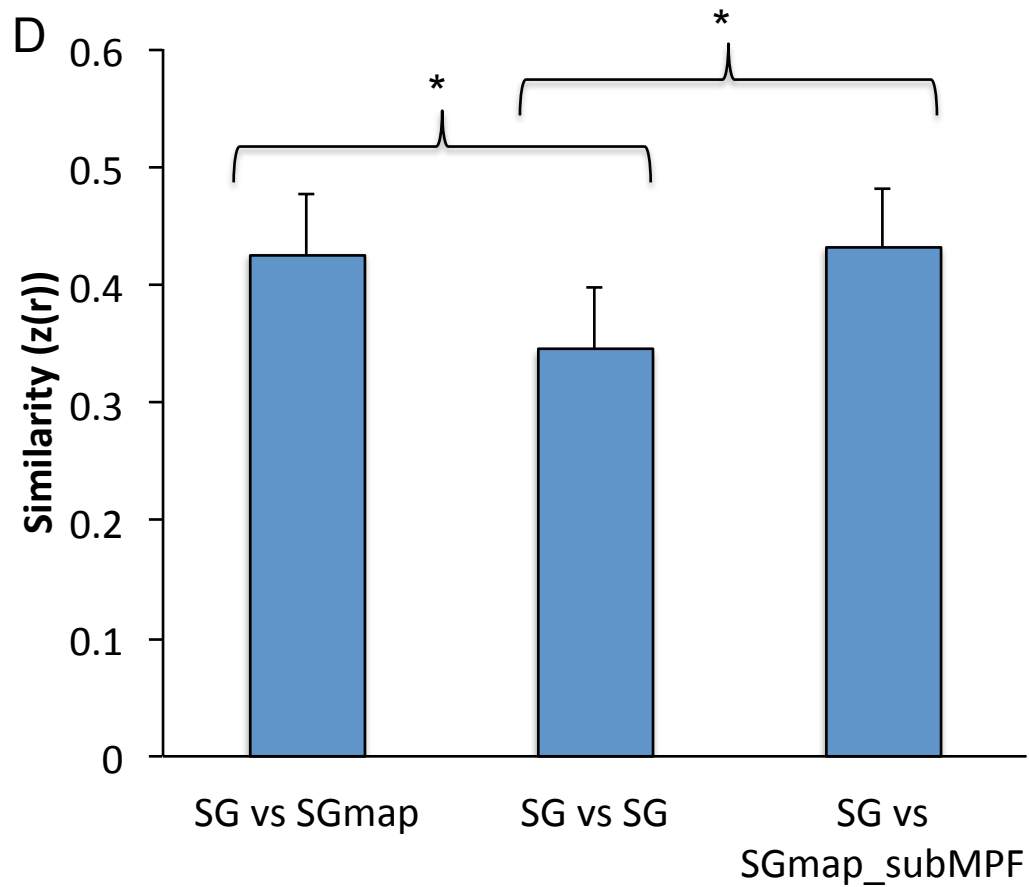

Supplement: NIHMS421348-supplement-05.pdf [file NIHMS421348-supplement-05.pdf]
